# Supplementary material for: The N-terminal domain of a tick evasin is critical for chemokine binding and neutralization and confers specific binding activity to other evasins
Source: PubMed Central journal article supplement (PMC5912465; doi:10.1074/jbc.ra117.000487), 2018-02-27
Supplement: supp_RA117.000487_133220_3_supp_80895_p4k08r.pdf [file supp_RA117.000487_133220_3_supp_80895_p4k08r.pdf]

## **Supplementary material:**

### **Functional characterization of a novel tick CC chemokine binding protein identifies a transportable CCL8 binding domain**

James R.O. Eaton<sup>1,2</sup>, Yara Alenazi<sup>1</sup>, Kamayani Singh<sup>1</sup>, Graham Davies<sup>1</sup>, Lucia Geis-Asteggiane<sup>2</sup>, Benedikt Kessler<sup>3</sup>, Carol V. Robinson<sup>2</sup>, Akane Kawamura<sup>1,2</sup> & Shoumo Bhattacharya<sup>1\*</sup>.

#### **Contents:**

**Table S1** – P672 sequence confirmation and glycosylation sites determination (added in a separate excel file).

**Fig. S1** – Characterisation of partially deglycosylated P672

**Fig. S2** – CCL8 top-down MS/MS HCD fragmentation spectra and annotated sequence.

**Fig. S3** – Native MS decharged monoisotopic spectra of partially deglycosylated P672.

**Fig. S4** – Native MS of CCL8:P672 complex with increasing amounts of CCL8

**Fig. S5** – Expression and characterization of P672(17\_104).

**Fig. S6** – Expression and purification of evasin hybrid molecules.

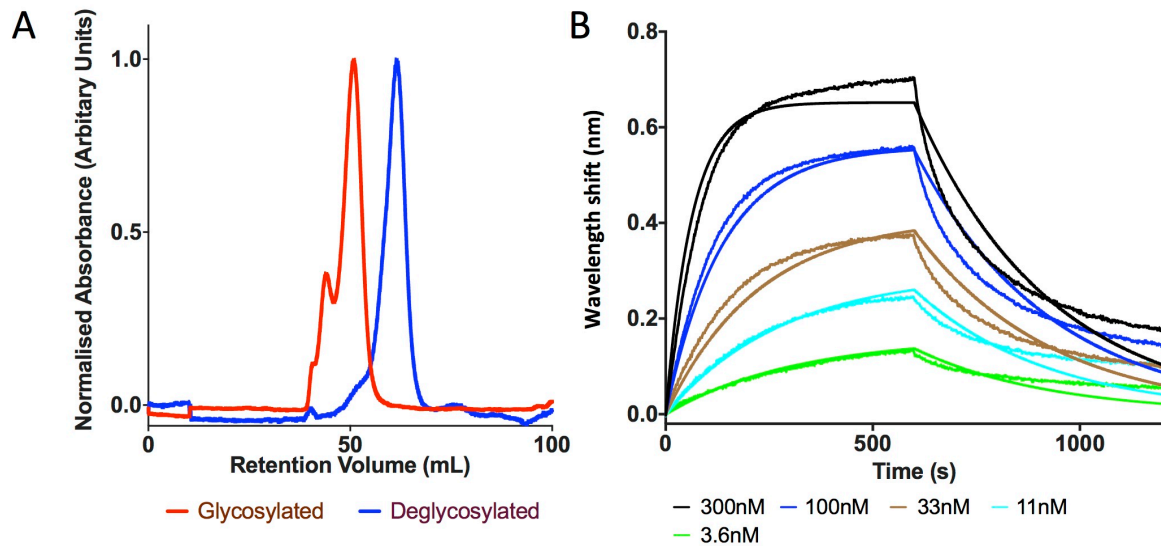

**Fig. S1 – Characterisation of partially deglycosylated N-terminally tagged P672.** **A.** Size exclusion chromatography traces of glycosylated P672 (red) and partially deglycosylated P672 (blue) using PNGaseF and EndoF1. **B.** Biolayer interferometry sensorgram of P672 (partially deglycosylated) binding to CCL8. Plots display wavelength shift (Y-axis, nm) versus time (X-axis, seconds). Solid lines indicate collected data, dashed lines indicate fitted data.  $K_d$  (M) =  $7.25E-08$ , target residence time = 3.8 minutes.

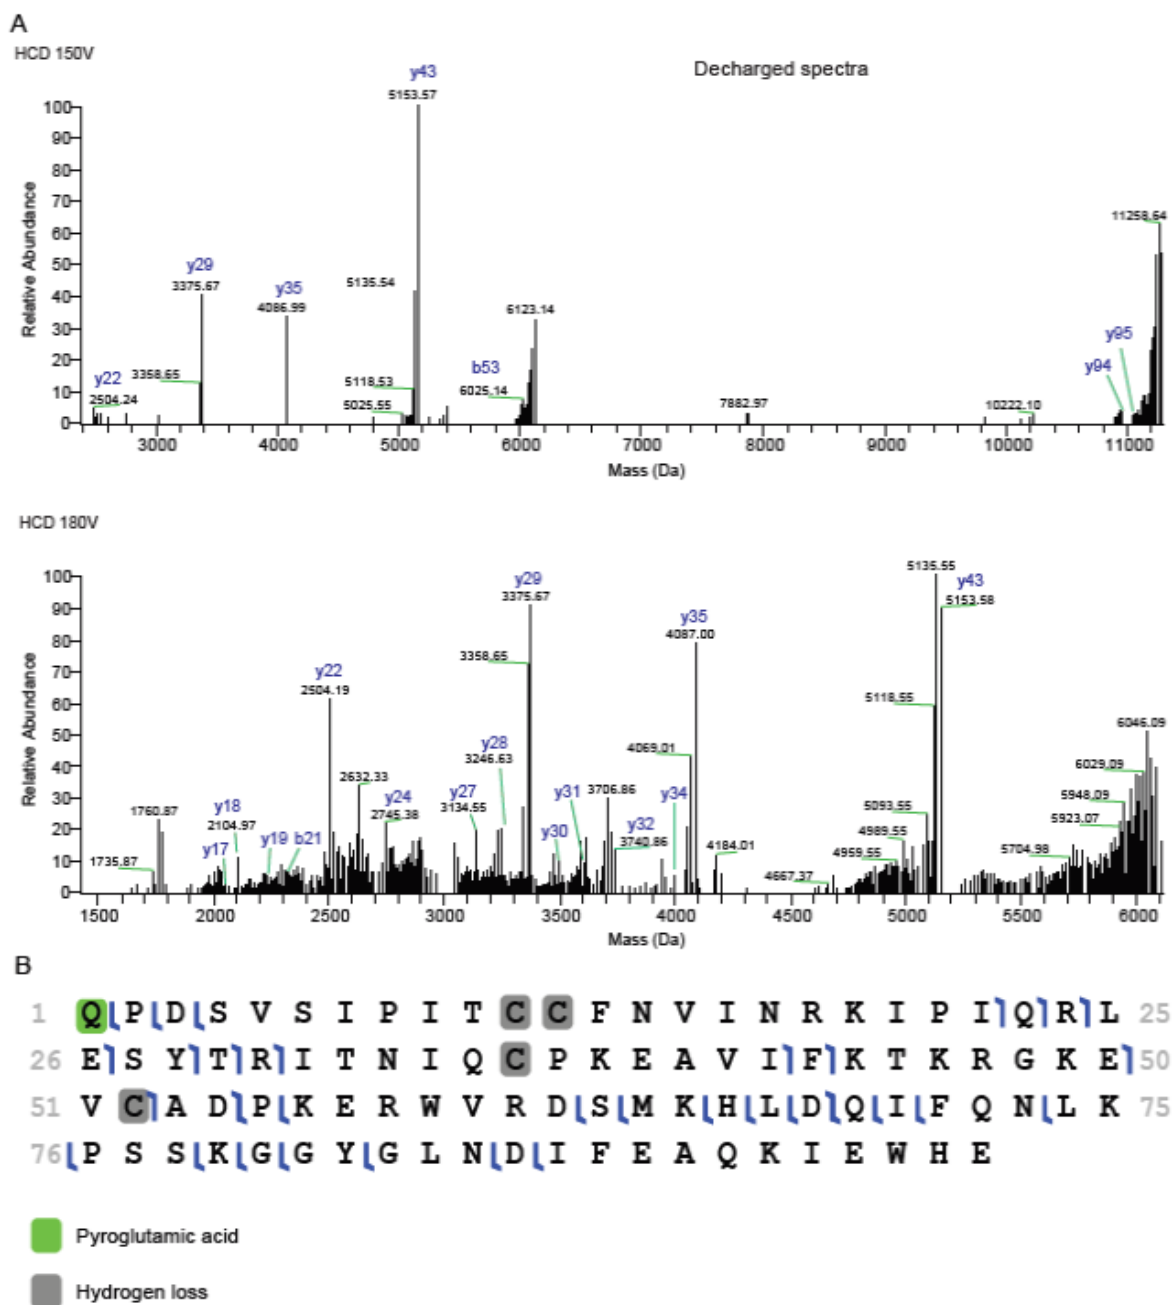

**Fig. S2 - CCL8 top-down MS/MS HCD fragmentation spectra and annotated sequence.** CCL8 monomer was characterized by selecting precursor ions (isolation window of 5  $m/z$ ) and fragmenting them using higher collision induced dissociation (HCD). **A.** Decharged monoisotopic spectra obtained for  $m/z$  2821 ( $z=5$ ) when fragmented with 150 and 180 V. **B.** Annotated sequence fragmentation pattern showing a 33% residue cleavage. The protein sequence included the presence of 2 disulfide bonds and the formation of pyroglutamic acid at the N-terminal glutamine during ionization (monoisotopic mass of 11276.76 Da).

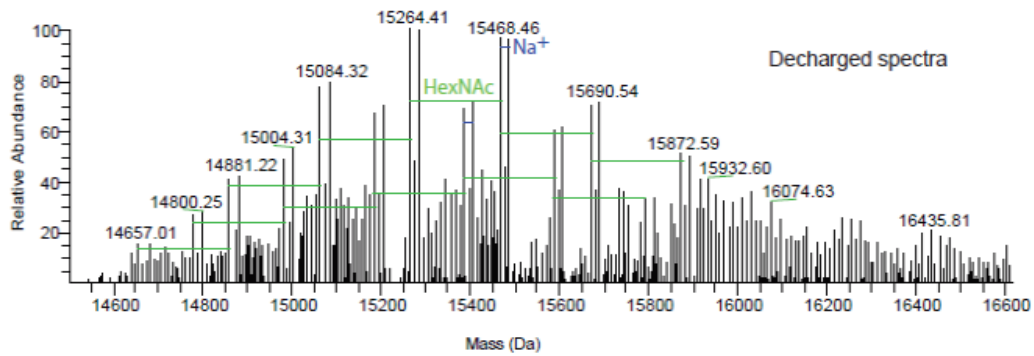

**Fig. S3 - Native MS decharged monoisotopic spectra of partially deglycosylated P672.** The decharged spectra shows monoisotopic masses of several P672-RHIPU modified forms. Mass differences suggesting the presence of sodium adducts and 5 to 6 HexNAc mass additions (+203 Da) were observed. The presence of partial glycosylations was supported by shotgun proteomics analyses.

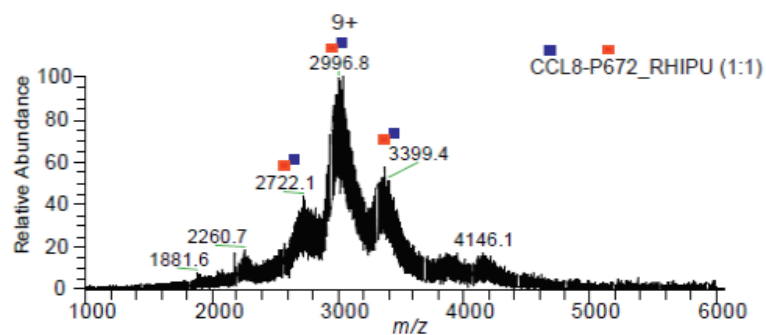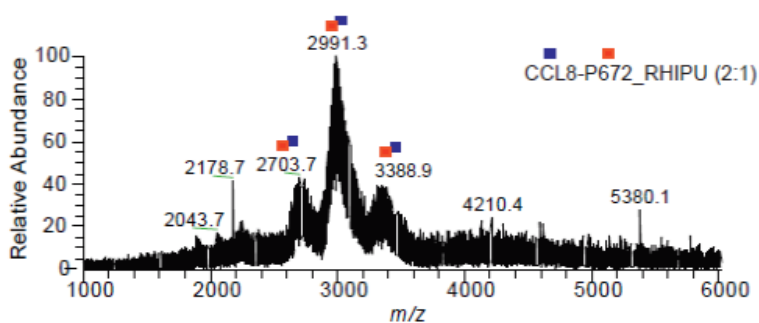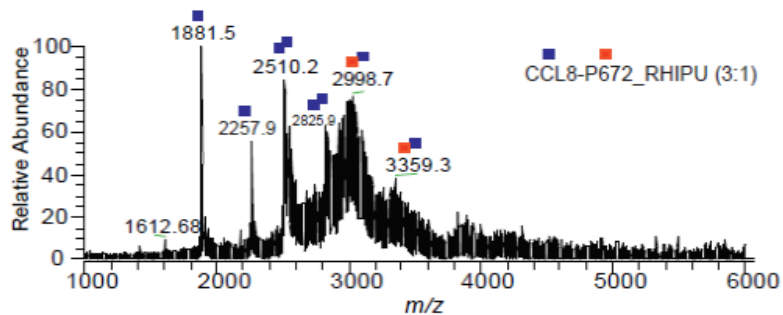

**Fig. S4 - Native MS of CCL8:P672 complex with increasing amounts of CCL8**

The P672:CCL8 complex was formed at ratios 1:1, 2:1 and 3:1 as indicated in top, middle and bottom panels. At 1:1 and 2:1 ratios the CCL8:P672 heterodimer is the prominent component observed and, as the ratio increase to 3:1, CCL8 monomer and homodimer are also observed.

Peaks are indicated as CCL8 (blue squares) or P672 (red squares). Monomers are indicated as a single square, and homo or heterodimers as double squares. Y-axis indicates relative abundance, X-axis indicates  $m/z$  (mass/charge) ratio.

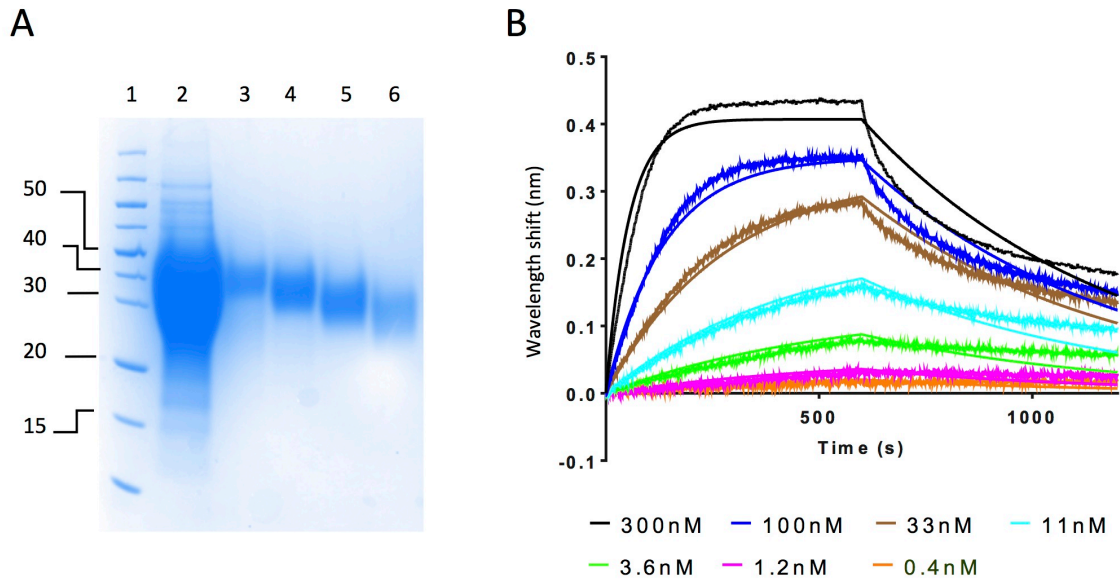

**Fig. S5 - Expression and characterization of P672(17\_104)**

**A.** Expression and purification of C-terminally tagged P672(17\_104). SDS-PAGE gel showing molecular weight marker (lane 1), Ni-NTA captured protein (lane 2) and size exclusion chromatography fractions (lanes 3-6) of C-terminally tagged P672(17-104) stained with colloidal Coomassie blue.

**B.** Biolayer interferometry sensorgram of P672(17\_104) binding to CCL8. Plots display wavelength shift (Y-axis, nm) versus time (X-axis, seconds). Solid lines indicate collected data, dashed lines indicate fitted data.  $K_d$  (M) =  $3.04E-08$ , target residence time = 6.7 minutes.

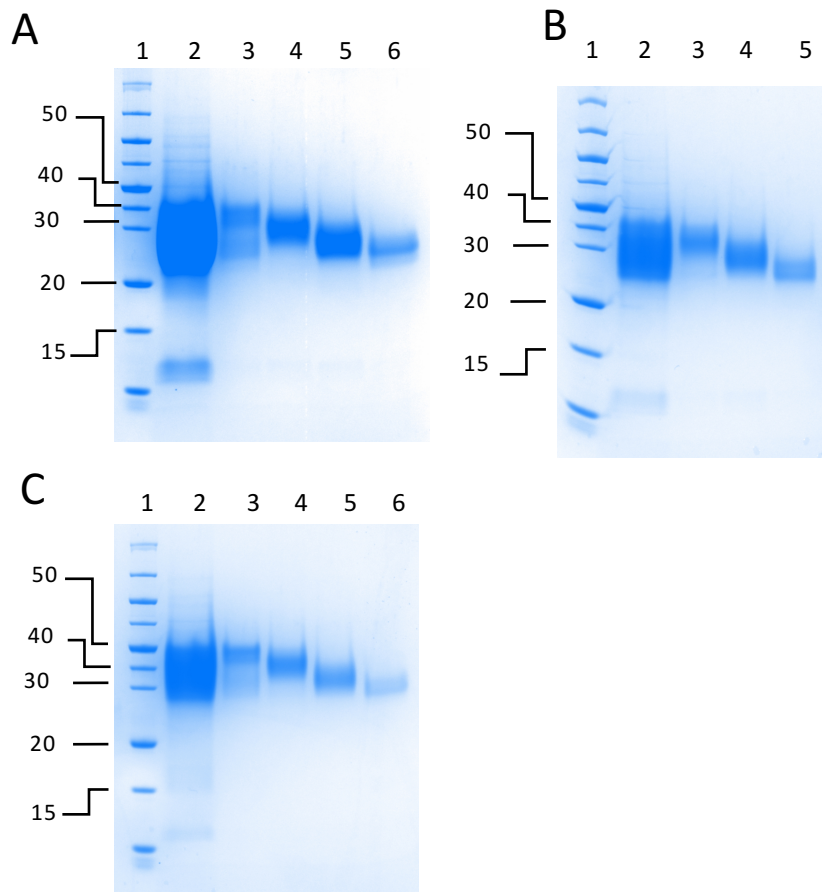

**Fig. S6 - Expression and purification of hybrid evasin proteins.** **A.** SDS-PAGE gel of molecular weight marker (lane 1), Ni-NTA captured protein (lane 2) and size exclusion chromatography fractions (lanes 3-6) of P672(1\_44): EVA1(29\_94). **B.** SDS-PAGE gel of molecular weight marker (lane 1), Ni-NTA captured protein (lane 2) and size exclusion chromatography fractions (lanes 3-5) of P672(1\_66): EVA1(47\_94). **C.** SDS-PAGE gel of molecular weight marker (lane 1), Ni-NTA captured protein (lane 2) and size exclusion chromatography fractions (lanes 3-6) of P672(1\_92): EVA1(74\_94).
